# Genetic variants and the risk of gestational diabetes mellitus: a systematic review

Cuilin Zhang<sup>1,\*†</sup>, Wei Bao<sup>1,\*†</sup>, Ying Rong<sup>2</sup>, Huixia Yang<sup>3</sup>, Katherine Bowers<sup>1</sup>, Edwina Yeung<sup>1</sup>, and Michele Kiely<sup>1</sup>

<sup>1</sup>Epidemiology Branch, Division of Epidemiology, Statistics and Prevention Research, Eunice Kennedy Shriver National Institute of Child Health and Human Development, National Institutes of Health, 6100 Executive Blvd, Rockville, MD 20852, USA <sup>2</sup>Department of Nutrition and Food Hygiene, Hubei Key Laboratory of Food Nutrition and Safety, School of Public Health, Tongji Medical College, Huazhong University of Science and Technology, Wuhan 430030, China <sup>3</sup>Department of Obstetrics and Gynecology, Peking University First Hospital, Beijing 100034, China

\*Correspondence address. Tel: +1-301-435-6917; Fax: +1-301-435-6917; Email: zhangcu@mail.nih.gov; wei.bao@nih.gov

Submitted on December 13, 2012; resubmitted on February 24, 2013; accepted on March 7, 2013

## TABLE OF CONTENTS

- Introduction
- Methods
- Results
- Discussion

**BACKGROUND:** Several studies have examined associations between genetic variants and the risk of gestational diabetes mellitus (GDM). However, inferences from these studies were often hindered by limited statistical power and conflicting results. We aimed to systematically review and quantitatively summarize the association of commonly studied single nucleotide polymorphisms (SNPs) with GDM risk and to identify important gaps that remain for consideration in future studies.

**METHODS:** Genetic association studies of GDM published through 1 October 2012 were searched using the HuGE Navigator and PubMed databases. A SNP was included if the SNP–GDM associations were assessed in three or more independent studies. Two reviewers independently evaluated the eligibility for inclusion and extracted the data. The allele-specific odds ratios (ORs) and 95% confidence intervals (CIs) were pooled using random effects models accounting for heterogeneity.

**RESULTS:** Overall, 29 eligible articles capturing associations of 12 SNPs from 10 genes were included for the systematic review. The minor alleles of rs7903146 (*TCF7L2*), rs1225372 (*TCF7L2*), rs1799884 (–30G/A, *GCK*), rs5219 (*E23K*, *KCNJ11*), rs7754840 (*CDKALI*), rs4402960 (*IGF2BP2*), rs10830963 (*MTNR1B*), rs1387153 (*MTNR1B*) and rs1801278 (Gly972Arg, *IRS1*) were significantly associated with a higher risk of GDM. Among them, genetic variants in *TCF7L2* showed the strongest association with GDM risk, with ORs (95% CIs) of 1.44 (1.29–1.60,  $P < 0.001$ ) per T allele of rs7903146 and 1.46 (1.15–1.84,  $P = 0.002$ ) per T allele of rs1225372.

**CONCLUSIONS:** In this systematic review, we found significant associations of GDM risk with nine SNPs in seven genes, most of which have been related to the regulation of insulin secretion.

**Key words:** gestational diabetes mellitus / single nucleotide polymorphism / gene / genetic factors

<sup>†</sup> The authors contributed equally to this work.

## Introduction

Gestational diabetes mellitus (GDM), defined as glucose intolerance with onset or first recognition during pregnancy, is a growing health concern (Reece *et al.*, 2009). The prevalence of GDM varies in different populations or ethnic groups. In the USA, ~7% (ranging from 1 to 14%) of all pregnancies are complicated by GDM (American Diabetes Association, 2004). Native American, Asian, Hispanic and African-American women are at higher risk for GDM than non-Hispanic white women (Ferrara, 2007). GDM increases risk of adverse pregnancy outcomes and has substantial long-term adverse health impacts on both mothers and their offspring, including a predisposition to obesity, metabolic syndrome and type 2 diabetes mellitus (T2DM) in later life (American Diabetes Association, 2004; Bellamy *et al.*, 2009; Reece *et al.*, 2009).

Well-documented risk factors for GDM include pre-pregnancy overweight and obesity, family history of diabetes and advanced maternal age (Ben-Haroush *et al.*, 2004; Zhang and Ning, 2011). In the past decade, accumulating evidence has indicated that poor diet and low physical activity before or during pregnancy may also represent risk factors of GDM (Zhang and Ning, 2011). In addition, interesting, though limited, data have shown that a history of subfertility or infertility may be related to an elevated risk of GDM (Jaques *et al.*, 2010; Reyes-Munoz *et al.*, 2012). Moreover, polycystic ovarian syndrome, a contributor to ovulatory disorder fertility, has been repeatedly linked to an increased GDM risk (Boomsma *et al.*, 2006; Bals-Pratsch *et al.*, 2011; Reyes-Munoz *et al.*, 2012).

There are relatively few published studies of the genetic susceptibility to GDM (Watanabe, 2011); although available data suggest that pregnancy complications have a familial tendency (Martin *et al.*, 1985; Solomon *et al.*, 1997). Moreover, GDM recurs in at least 30% (range 30–84%) of women with a history of GDM (Kim *et al.*, 2007), potentially suggesting that there is a subgroup of women who may be genetically predisposed to develop GDM. Defects in both insulin secretion and insulin action are crucial in the pathogenesis of GDM (Buchanan and Xiang, 2005). A study among Danish twins showed major genetic components in both traits; more than 75% of the variation of the insulin secretion trait and at least 53% of peripheral insulin sensitivity can be explained by genetic components (Poulsen *et al.*, 2005). Taken together, the evidence supports a genetic component in the etiology of GDM. Over the past few decades, genetic loci in several genes, responsible for insulin secretion, insulin resistance, lipid and glucose metabolism and other pathways, have been associated with GDM risk. However, inferences have been hindered by inconsistent findings across studies, partly owing to small sample size, moderate gene effects and insufficient statistical power (Robitaille and Grant, 2008).

In this study, we aimed to systematically review the current evidence regarding the genetic associations of GDM to quantitatively summarize the effect size of replicated single nucleotide polymorphisms (SNPs) on GDM risk, and to identify important gaps that remain for consideration in future studies.

## Methods

We adhered to the Meta-analysis Of Observational Studies in Epidemiology (MOOSE) guidelines (Stroup *et al.*, 2000) when undertaking this study.

## Literature search and data extraction

Genetic association studies of GDM published through 1 October 2012 were searched mainly using the HuGE Navigator (Yu *et al.*, 2008), an integrated database of genetic associations and human genome epidemiology studies. The HuGE Navigator has been found to be equally sensitive, but more specific than PubMed in a previous validation study (Palomaki *et al.*, 2010). The search term 'gestational diabetes [Text Mesh]' was used for the HuGE Navigator search. As the HuGE Navigator only retrieves articles published since 2001, an additional PubMed search was conducted to identify publications through 31 December 2001. For the PubMed search, the following search terms were used: ('Diabetes, Gestational/genetics'[Mesh] or 'Diabetes, Gestational/epidemiology'[Mesh] or 'Gestational diabetes'[tiab]) and ('Polymorphism, Single Nucleotide'[Mesh] or polymorphism\*[tiab]) not (review[pt] or editorial[pt]). In addition, the references listed in relevant original papers and review articles were screened. No restriction was applied on language or geographical location in the literature search process.

Two reviewers (W.B. and Y.R.) independently evaluated the eligibility of inclusion and extracted the data, and disagreements were resolved by consensus. Articles were included if they reported original data about testing for SNP main effects on GDM risk. An SNP was included if the SNP–GDM associations were assessed in three or more independent studies. Cross-sectional, case–control and cohort studies were eligible for inclusion. Several types of articles were excluded: reviews or editorials, non-human studies (cell culture or animal studies), family-based studies, studies that did not include GDM as the primary outcome, studies that did not evaluate genetic associations of GDM and pharmacogenetics studies for anti-diabetic medication. In addition, other exclusions included studies that did not include a healthy control group, studies that did not report sufficient data for effect estimates of the genetic associations and studies that did not separately report association measures for GDM.

The following data were extracted from each published article: the first author's name, year of publication, sample size, number of GDM cases, ethnicity, mean age, study design (case–control, cross-sectional or cohort study), genetic variants, genotyping method, crude genotype and allele distribution by GDM status, odds ratios (ORs) and 95% confidence intervals (CIs). If ORs were available but the genotype and allele distributions according to GDM status were not reported in the original article, the corresponding authors were contacted by email.

## Data synthesis and statistical analysis

The ORs of individual studies were recalculated from the available genotype distributions according to an allelic model, pooled using random effect models (DerSimonian and Laird, 1986) and visualized by forest plots. Hardy–Weinberg equilibrium (HWE) was assessed for each study by use of Fisher's exact test instead of the  $\chi^2$  test reported in the individual studies as it yields increased statistical power (Bauer *et al.*, 2011). HWE was tested in the whole population for cohort studies and in the control group for case–control studies. Heterogeneity across all eligible comparisons was assessed using the  $\chi^2$ -based Cochran's *Q* statistic and the *I*<sup>2</sup> metric (*I*<sup>2</sup> value of 25, 50 and 75% were considered as low, medium, and high heterogeneity, respectively; Higgins *et al.*, 2003). The potential sources of identified heterogeneity among studies were investigated by stratification analyses. A formal meta-regression was not performed because the number of studies for some SNPs was small. Sensitivity analyses were performed by omitting one study at a time and computing the pooled ORs of the remaining studies to evaluate whether the results were affected markedly by a single study. The possibility of publication bias was statistically assessed using Egger regression asymmetry test (Egger *et al.*, 1997).

All statistical analyses were performed using Stata software version 11.0 (Stata Corp, College Station, TX, USA). All *P*-values presented are two-tailed with a significance level of 0.05, except the Cochran's *Q* statistic in heterogeneity test in which the significance level was 0.10 (Higgins et al., 2003).

## Results

### Description of the included studies

The initial literature search yielded 89 articles from HuGE Navigator (2001–2012) and 23 articles from PubMed (1950–2001). After applying the inclusion and exclusion criteria, 29 articles capturing 12 SNPs from 10 genes were ultimately included in the systematic review and meta-analysis (Fig. 1). Of the 10 genes, six were related to insulin secretion, two to insulin resistance, one to energy metabolism and one to an inflammatory pathway (Table I). The study characteristics and the genotype and allele distributions of SNPs in the included studies are shown in Tables II and III, respectively.

### Genes and genetic variants related to insulin secretion

#### *Transcription factor 7-like 2 (TCF7L2)*

The rs7903146 variant in the *TCF7L2* gene was the most widely studied variant in association with GDM, and showed a consistent and strong association across different populations. A meta-analysis of nine studies (Shaath et al., 2007; Cho et al., 2009; Lauenborg et al., 2009; Freathy et al., 2010; Pappa et al., 2011; Papadopoulou et al., 2011; Kwak et al., 2012; Vcelak et al., 2012) showed that the T allele of rs7903146 was associated with an increased risk of GDM [pooled OR 1.44 (95% CI 1.29–1.60),  $P < 0.001$ ; Table IV, Fig. 2A]. The observed heterogeneity across studies for rs7903146 resulted from differences in the study populations in a stratification analysis by race/ethnicity; no significant heterogeneity was observed in Asians ( $I^2 = 0.0\%$ ;  $P$  for the *Q* statistic = 0.916), although there

was still a significant heterogeneity among Caucasians ( $I^2 = 68.4\%$ ;  $P$  for the *Q* statistic = 0.007).

In addition, a similar association was found in a meta-analysis of four studies (Watanabe et al., 2007; Cho et al., 2009; Papadopoulou et al., 2011; Vcelak et al., 2012) regarding the T allele of rs12255372 and GDM risk; the pooled OR was 1.46 (95% CI 1.15–1.84,  $P = 0.002$ ), without significant heterogeneity across studies ( $I^2 = 48.3\%$ ;  $P$  for the *Q* statistic = 0.122; Table IV, Fig. 2B). The similar effect sizes between associations of GDM risk with rs12255372 and rs7903146 were expected given the strong correlation between these two variants ( $r^2 = 1$  in the HapMap CEU population; Povel et al., 2011).

No indication of publication bias was observed for either variant ( $P = 0.148$  for rs7903146 and  $P = 0.259$  for rs12255372 in the Egger's test). Deviations from the HWE were observed in two studies with rs7903146 (Lauenborg et al., 2009; Papadopoulou et al., 2011) and one with rs12255372 (Papadopoulou et al., 2011). In sensitivity analyses by omitting these studies, the pooled ORs were not changed materially and remained significant.

#### *Glucokinase (GCK)*

The association between the rs1799884 (also known as –30G/A) variant in the *GCK* gene and GDM risk has been widely investigated, but the results are conflicting (Chiu et al., 1994; Zaidi et al., 1997; Shaath et al., 2006; Freathy et al., 2010; Santos et al., 2010). Although early studies (Chiu et al., 1994; Zaidi et al., 1997) found no significant association between rs1799884 and GDM risk, subsequent studies with larger sample sizes found a significant association (Shaath et al., 2006; Freathy et al., 2010). A meta-analysis of these studies showed that the T allele of rs1799884 was associated with an increased risk of GDM [pooled OR 1.29 (95% CI 1.17–1.42),  $P < 0.001$ ; Table IV, Fig. 2C]. No indication of significant heterogeneity across studies ( $I^2 = 0.0\%$ ;  $P$  for the *Q* statistic = 0.878) or publication bias ( $P = 0.467$  in the Egger's test) was observed.

#### *Potassium inwardly rectifying channel, subfamily J, member 11 (KCNJ11)*

The association between rs5219 (also known as E23K) and GDM was modest (ranging from 1.12–1.17) in the included studies (Shaath et al., 2005; Cho et al., 2009; Lauenborg et al., 2009; Pappa et al., 2011). Our meta-analysis showed that the T allele of rs5219 was associated with an increased risk of GDM [pooled OR 1.15 (95% CI 1.06–1.26),  $P = 0.002$ ; Table IV, Fig. 2D]. No indication of significant heterogeneity across studies ( $I^2 = 0.0\%$ ;  $P$  for the *Q* statistic = 0.976) or publication bias ( $P = 0.750$  in the Egger's test) was observed.

#### *CDK5 regulatory subunit associated protein 1-like 1 (CDKAL1)*

The association between rs7754840 in *CDKAL1* and GDM risk has been examined in three studies, all of which were conducted among Asian populations (Cho et al., 2009; Wang et al., 2011; Kwak et al., 2012). Our meta-analysis indicated that the C allele of rs7754840 was significantly associated with risk of GDM [pooled OR 1.40 (95% CI 1.13–1.72),  $P = 0.002$ ; Table IV, Fig. 2E]. The observed heterogeneity across these studies resulted from differences in the study populations; two studies in Korean women showed strong associations between rs7754840 and GDM risk (Cho et al., 2009; Kwak et al., 2012), whereas a study in Chinese women found no significant

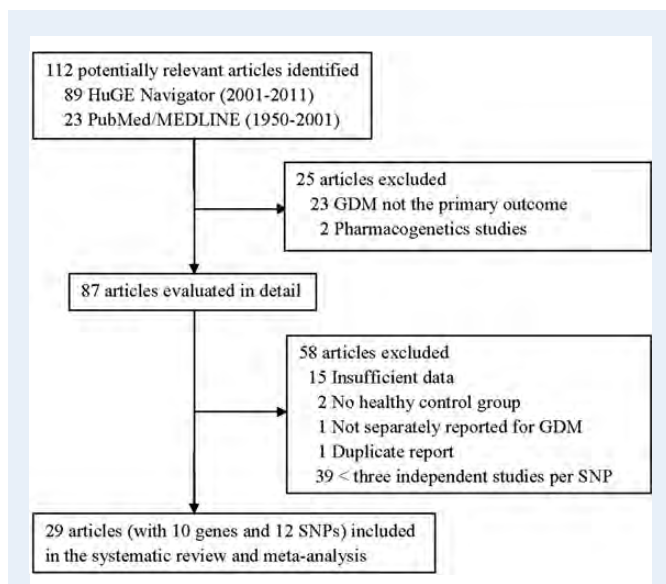

**Figure 1** Flow chart for study selection.

**Table 1** Genes and genetic variants included in the systematic review and their pathways

| Gene    | Chromosome location | Description                                                   | Variants                           | Insulin secretion | Insulin resistance | Other pathways    |
|---------|---------------------|---------------------------------------------------------------|------------------------------------|-------------------|--------------------|-------------------|
| TCF7L2  | 10q25.3             | Transcription factor 7-like 2                                 | rs7903146 (IVS3C>T);<br>rs12255372 | Yes               |                    |                   |
| GCK     | 7p15.3–p15.1        | Glucokinase                                                   | rs1799884 (–30G/A)                 | Yes               |                    |                   |
| KCNJ11  | 11p15.1             | Potassium inwardly rectifying channel, subfamily J, member 11 | rs5219 (E23K)                      | Yes               |                    |                   |
| CDKAL1  | 6p22.3              | CDK5 regulatory subunit associated protein 1-like 1           | rs7754840                          | Yes               |                    |                   |
| IGF2BP2 | 3q27.2              | Insulin-like growth factor 2 mRNA-binding protein 2           | rs4402960                          | Yes               |                    |                   |
| MTNRI1B | 11q21–q22           | Melatonin receptor 1B                                         | rs10830963; rs1387153              | Yes               |                    |                   |
| PPARG   | 3p25                | Peroxisome proliferator-activated receptor gamma              | rs1801282 (Pro12Ala)               |                   | Yes                |                   |
| IRS1    | 2q36                | Insulin receptor substrate 1                                  | rs1801278 (Gly972Arg)              |                   | Yes                |                   |
| ADRB3   | 8p12                | Adrenoceptor beta 3                                           | rs4994 (Trp64Arg)                  |                   |                    | Energy metabolism |
| TNF     | 6p21.3              | Tumor necrosis factor                                         | rs1800629 (–308G/A)                |                   |                    | Inflammation      |

association (Wang *et al.*, 2011). No indication of publication bias ( $P = 0.703$  in the Egger's test) was observed.

#### Insulin-like growth factor 2 mRNA-binding protein 2 (IGF2BP2)

The association between rs4402960 and GDM risk showed similar effect sizes in Asian and Caucasian populations (Cho *et al.*, 2009; Lauenborg *et al.*, 2009; Wang *et al.*, 2011). A meta-analysis of these studies showed that the T allele of rs4402960 was significantly associated with an increased risk of GDM [pooled OR 1.21 (95% CI 1.10–1.33),  $P < 0.001$ ; Table IV, Fig. 2F]. No indication of significant heterogeneity across studies ( $I^2 = 0.0\%$ ;  $P$  for the  $Q$  statistic = 0.842) or publication bias ( $P = 0.550$  in the Egger's test) was observed.

#### Melatonin receptor 1B (MTNRI1B)

Kim *et al.* (2011) first found a significant association of GDM risk with two variants in the MTNRI1B locus, rs10830963 and rs1387153, which are in tight linkage disequilibrium (LD) with each other ( $|D'| = 0.89$ ). The association between rs10830963 and GDM risk was replicated in a subsequent study of a Greek population (Vlassi *et al.*, 2012). Our meta-analyses showed that the T allele of rs1387153 and G allele of rs10830963 were associated with an increased risk of GDM; the pooled ORs were 1.30 (95% CI 1.18–1.43,  $P < 0.001$ ) and 1.28 (95% CI 1.05–1.55,  $P = 0.016$ ), respectively (Table IV, Fig. 2G and H). There was no indication of significant heterogeneity across studies regarding rs1387153 and GDM risk ( $I^2 = 0.0\%$ ;  $P$  for the  $Q$  statistic = 0.691). The observed heterogeneity across studies for rs10830963 resulted from differences in the study populations; the study in Greek women found a strong and significant association (Vlassi *et al.*, 2012), in Korean women, a weak but significant association (Kim *et al.*, 2011), while in Chinese women there was no significant association (Wang *et al.*, 2011). No indication of publication bias was observed for either variant ( $P = 0.744$  for rs1387153 and  $P = 0.567$  for rs10830963 in the Egger's test).

### Genes and genetic variants related to insulin resistance

#### Peroxisome proliferator-activated receptor gamma (PPARG)

The association between rs1801282 and GDM risk has been examined in eight studies among several populations (Shaath *et al.*, 2004; Tok *et al.*, 2006b; Shaath *et al.*, 2007; Cho *et al.*, 2009; Lauenborg *et al.*, 2009; Cheng *et al.*, 2010; Heude *et al.*, 2011; Pappa *et al.*, 2011); however, none of these found a significant association. A meta-analysis of these studies showed that the G allele of rs1801282 was not significantly associated with GDM risk [pooled OR 0.94 (95% CI 0.82–1.07),  $P = 0.322$ ; Table IV, Fig. 3A]. No indication of significant heterogeneity across studies ( $I^2 = 0.0\%$ ;  $P$  for the  $Q$  statistic = 0.450) or publication bias ( $P = 0.061$  in the Egger's test) was observed.

#### Insulin receptor substrate 1 (IRS1)

The association between rs1801278 (also known as Gly972Arg) and GDM has been examined in four studies (Shaath *et al.*, 2005; Fallucca *et al.*, 2006; Tok *et al.*, 2006a; Pappa *et al.*, 2011), all among Caucasians. Our meta-analysis of these studies showed that the T allele of rs1801278 was significantly associated with an increased risk of GDM [pooled OR 1.39 (95% CI 1.04–1.85),  $P = 0.027$ ; Table IV, Fig. 3B]. No indication of significant heterogeneity across studies ( $I^2 = 34.5\%$ ;  $P$  for the  $Q$  statistic = 0.205) or publication bias ( $P = 0.602$  in the Egger's test) was observed.

### Genes and genetic variants related to other pathways

#### Adrenoceptor beta 3 ( $\beta$ 3-adrenergic receptor, ADRB3)

Five small studies examined the association between rs4994 (also known as Trp64Arg) and GDM with inconsistent results (Festa *et al.*, 1999; Alevizaki *et al.*, 2000; Tsai *et al.*, 2004; Fallucca *et al.*, 2006; Shaath *et al.*, 2007). Festa *et al.* (1999) found that the A/G genotype was more frequent in women with GDM ( $n = 70$ ) than in those with normal glucose tolerance ( $n = 109$ ; 26 versus 11%;  $P = 0.01$ ).



**Table II** Characteristics of the included studies regarding the association between genetic variants and GDM risk

| Author, year (reference)           | Study design | Ethnicity        | Country          | Number of cases | Number of controls | Mean age (cases/controls) | GDM criteria                                                                                     | Genotyping method                               |
|------------------------------------|--------------|------------------|------------------|-----------------|--------------------|---------------------------|--------------------------------------------------------------------------------------------------|-------------------------------------------------|
| Chiu et al. (1994)                 | Case-control | African-American | USA              | 97              | 99                 | 28.2/22.1                 | O'Sullivan and Mahan criteria                                                                    | PCR-SSCP                                        |
| Zaidi et al. (1997)                | Case-control | Caucasian        | UK               | 47              | 45                 | NA                        | OGTT 2 h glucose > 7.8 mmol/l                                                                    | RFLP-PCR                                        |
| Festa et al. (1999)                | Case-control | Caucasian        | Austria          | 70              | 109                | NA                        | OGTT 1 h glucose $\geq$ 8.9 mmol/l or OGTT 2 h glucose $\geq$ 7.8 mmol/l                         | RFLP-PCR                                        |
| Alevizaki et al. (2000)            | Case-control | Caucasian        | Greek            | 180             | 131                | NA                        | ADA criteria                                                                                     | RFLP-PCR                                        |
| Shaat et al. (2004) <sup>a</sup>   | Case-control | Arabian          | Sweden           | 100             | 122                | 31.9/NA                   | NA                                                                                               | RFLP-PCR                                        |
| Tsai et al. (2004)                 | Case-control | Asian            | China            | 41              | 258                | NA                        | OGTT (not specified)                                                                             | RFLP-PCR                                        |
| Chang et al. (2005)                | Case-control | Asian            | China            | 35              | 35                 | 30/28                     | OGTT (not specified)                                                                             | RFLP-PCR                                        |
| Shaat et al. (2005)                | Case-control | Caucasian        | Sweden           | 588             | 1189               | 32.2/30.5                 | EASD-DPSG criteria                                                                               | TaqMan allelic discrimination assay             |
| Fallucca et al. (2006)             | Case-control | Caucasian        | Italy            | 309             | 277                | 34.1/32.7                 | Carpenter and Coustan criteria                                                                   | RFLP-PCR                                        |
| Shaat et al. (2006)                | Case-control | Caucasian        | Sweden           | 642             | 1229               | 32.3/30.5                 | EASD-DPSG criteria                                                                               | RFLP-PCR                                        |
| Tok et al. (2006a)                 | Case-control | Caucasian        | Turkey           | 62              | 100                | NA                        | NDDG criteria                                                                                    | RFLP-PCR                                        |
| Tok et al. (2006b)                 | Case-control | Caucasian        | Turkey           | 62              | 100                | NA                        | NDDG criteria                                                                                    | RFLP-PCR                                        |
| Shaat et al. (2007)                | Case-control | Caucasian        | Sweden           | 649             | 1232               | 32.3/30.5                 | EASD-DPSG criteria                                                                               | TaqMan allelic discrimination assay             |
| Watanabe et al. (2007)             | Case-control | Mexican-American | USA              | 94              | 58                 | 35.0/33.4                 | OGTT (not specified)                                                                             | TaqMan allelic discrimination assay             |
| Cho et al. (2009)                  | Case-control | Asian            | Korea            | 869             | 632                | 32/64.7                   | Third IWCGDM criteria                                                                            | TaqMan allelic discrimination assay             |
| Lauenborg et al. (2009)            | Case-control | Caucasian        | Denmark          | 283             | 2446               | 43.1/45.2                 | WHO criteria 1999                                                                                | TaqMan allelic discrimination assay             |
| Cheng et al. (2010)                | Case-control | Asian            | China            | 55              | 173                | 27/29.6                   | OGTT (not specified)                                                                             | PCR-denaturing HPLC                             |
| Freathy et al. (2010) (Caucasians) | Case-control | Caucasian        | Australia and UK | 614             | 3811               | NA                        | IADPSG 2010 criteria                                                                             | TaqMan allelic discrimination assay             |
| Freathy et al. (2010) (Asians)     | Case-control | Asian            | Thailand         | 384             | 1706               | NA                        | IADPSG 2010 criteria                                                                             | TaqMan allelic discrimination assay             |
| Montazeri et al. (2010)            | Case-control | Asian            | Malaysia         | 110             | 102                | NA                        | WHO criteria 1999                                                                                | RFLP-PCR                                        |
| Santos et al. (2010)               | Case-control | Caucasian        | Brazil           | 150             | 600                | NA                        | ADA 2009 criteria                                                                                | RFLP-PCR                                        |
| Heude et al. (2011)                | Cohort       | Caucasian        | France           | 109             | 1587               | NA                        | 50-g glucose load                                                                                | RFLP-PCR or TaqMan allelic discrimination assay |
| Kim et al. (2011)                  | Case-control | Asian            | Korea            | 928             | 990                | 33.17/32.24               | Carpenter and Coustan criteria                                                                   | TaqMan allelic discrimination assay             |
| Papadopoulou et al. (2011)         | Case-control | Caucasian        | Sweden           | 826             | 1185               | NA                        | EASD-DPSG criteria                                                                               | TaqMan allelic discrimination assay             |
| Pappa et al. (2011)                | Case-control | Caucasian        | Greece           | 148             | 107                | 32.5/26.67                | Fourth IWCGDM criteria                                                                           | RFLP-PCR                                        |
| Wang et al. (2011)                 | Case-control | Asian            | China            | 725             | 1039               | 32.0/30.0                 | ADA criteria                                                                                     | TaqMan allelic discrimination assay             |
| Gueuvoghlian-Silva et al. (2012)   | Case-control | Mixed            | Brazil           | 79              | 168                | 31.3/29.1                 | WHO criteria                                                                                     | RFLP-PCR                                        |
| Kwak et al. (2012)                 | Case-control | Asian            | Korea            | 1399            | 2025               | 31.5/59.1; 32.5/66.1      | Third IWCGDM criteria                                                                            | SNP array                                       |
| Vcelak et al. (2012)               | Case-control | Caucasian        | Czech Republic   | 260             | 376                | 32.8/NA                   | Gestational diabetics meeting the 0.5–1 year interval after childbirth without other pathologies | TaqMan allelic discrimination assay             |

|                      |              |           |        |    |    |             |              |          |
|----------------------|--------------|-----------|--------|----|----|-------------|--------------|----------|
| Vlassi et al. (2012) | Case-control | Caucasian | Greece | 77 | 98 | 35.45/31.39 | ADA criteria | RFLP-PCR |
|----------------------|--------------|-----------|--------|----|----|-------------|--------------|----------|

<sup>a</sup>The data of Caucasians were updated by Shaat et al. (2007) and therefore they were not included here.  
ADA, American Diabetes Association; EASD-DPSG, the Diabetes and Pregnancy Study Groups of the European Association for the Study of Diabetes; GDM, gestational diabetes mellitus; HPLC, high-performance liquid chromatography; IADPSG, the International Association of Diabetes and Pregnancy Study Groups; IWCGDM, International Workshop-Conference on Gestational Diabetes Mellitus; NDDG, National Diabetes Data Group; OGTT, oral glucose tolerance test; RFLP, restriction fragment length polymorphism; PCR, polymerase chain reaction; SSCP, single-strand conformation polymorphism; WHO, World Health Organization.

However, this positive association was not confirmed in subsequent studies (Alevizaki et al., 2000; Tsai et al., 2004; Fallucca et al., 2006; Shaat et al., 2007). Our meta-analysis of these five studies showed no significant association between the G allele of rs4994 and GDM risk [pooled OR 1.20 (95% CI 0.88–1.65),  $P = 0.252$ ; Table IV, Fig. 4A]. No indication of significant heterogeneity across studies ( $I^2 = 38.8\%$ ;  $P$  for the  $Q$  statistic = 0.163) or publication bias ( $P = 0.916$  in the Egger's test) was observed.

Tumor necrosis factor (TNF)

A meta-analysis of three studies (Chang et al., 2005; Montazeri et al., 2010; Gueuvoghlanian-Silva et al., 2012) showed no significant association between rs1800629 and GDM [pooled OR 1.64 (95% CI 0.73–3.69),  $P = 0.228$ ; Table IV, Fig. 4B]. The observed heterogeneity across these studies resulted from differences in the study populations; a significant and strong association between rs1800629 and GDM was found in a Chinese population (Chang et al., 2005), but the positive genetic association was not replicated in Malaysians (Montazeri et al., 2010) or Brazilians (Gueuvoghlanian-Silva et al., 2012). No indication of significant publication bias ( $P = 0.987$  in the Egger's test) was observed. It should be noted that the sample size in the included studies was small (in total 224 cases and 305 controls) and deviations from the HWE were observed in two studies (Chang et al., 2005; Montazeri et al., 2010); therefore the association between rs1800629 and GDM needs to be confirmed in more studies.

Discussion

In this study, we investigated relatively frequently studied genetic variants in association with GDM risk. Several previous reviews have mainly focused on the evidence regarding T2DM-associated common variants and GDM susceptibility (Watanabe et al., 2007; Robitaille and Grant, 2008; Konig and Shuldiner, 2012; Mao et al., 2012). Our systematic review provided a more comprehensive summary of the currently available evidence regarding GDM genetic variants. Overall, we observed significant associations of GDM with SNPs in the TCF7L2, GCK, KCNJ11, CDKAL1, IGF2BP2, MTNR1B and IRS1 genes.

Although pregnancy is a condition characterized by progressive insulin resistance (Buchanan and Xiang, 2005; Watanabe, 2011), GDM develops in only a small proportion of pregnant women (American Diabetes Association, 2004). The insulin resistance that develops during pregnancy may result from a combination of increased maternal adiposity and the insulin-desensitizing effects of placental products such as human placental lactogen, estrogen and prolactin (Di Cianni et al., 2003). Normally, the increased insulin resistance during pregnancy is compensated by the increase in insulin secretion by pancreatic islet  $\beta$  cells. As a result, the changes in circulating glucose levels over the course of pregnancy are quite small, compared with the large changes in insulin sensitivity (Buchanan and Xiang, 2005).

GDM could develop when a genetic predisposition of pancreatic islet  $\beta$ -cell impairment is unmasked by the increased insulin resistance during pregnancy (Lambrinoudaki et al., 2010). Among the most widely studied genes of GDM included in the present systematic review, six genes (TCF7L2, GCK, KCNJ11, CDKAL1, IGF2BP2 and MTNR1B) are thought to modulate pancreatic islet  $\beta$ -cell function (Petrie et al., 2011; Schafer et al., 2011), and all of them were significantly associated with GDM risk (ORs ranging from 1.15 to 1.46). In

**Table III** Genotype and allele distribution among GDM cases and controls in the included studies

| Author, year                       | Gene    | Variants   | Minor allele | Number of participants |          | Genotypes in GDM cases <sup>a</sup> |     |     | Genotypes in controls <sup>a</sup> |      |      | Minor allele frequency (%) |          | HWE (P-value)     |
|------------------------------------|---------|------------|--------------|------------------------|----------|-------------------------------------|-----|-----|------------------------------------|------|------|----------------------------|----------|-------------------|
|                                    |         |            |              | Cases                  | Controls | AA                                  | AB  | BB  | AA                                 | AB   | BB   | Cases                      | Controls |                   |
| Chiu et al. (1994)                 | GCK     | rs1799884  | T            | 97                     | 99       | 4                                   | 37  | 56  | 2                                  | 34   | 63   | 23.2                       | 19.2     | 0.51              |
| Zaidi et al. (1997)                | GCK     | rs1799884  | T            | 47                     | 45       | 2                                   | 20  | 25  | 1                                  | 22   | 22   | 25.5                       | 26.7     | 0.14              |
| Festa et al. (1999)                | ADRB3   | rs4994     | G            | 70                     | 109      | 0                                   | 18  | 52  | 0                                  | 12   | 97   | 12.9                       | 5.5      | 1.00              |
| Alevizaki et al. (2000)            | ADRB3   | rs4994     | G            | 180                    | 131      | 0                                   | 12  | 168 | 0                                  | 9    | 122  | 3.3                        | 3.4      | 1.00              |
| Shaat et al. (2004) <sup>d</sup>   | PPARG   | rs1801282  | G            | 100                    | 122      | 0                                   | 9   | 91  | 1                                  | 15   | 106  | 4.5                        | 7.0      | 0.45              |
| Tsai et al. (2004)                 | ADRB3   | rs4994     | G            | 41                     | 258      | 1                                   | 6   | 34  | 6                                  | 63   | 189  | 9.8                        | 14.5     | 0.80              |
| Chang et al. (2005)                | TNF     | rs1800629  | A            | 35                     | 35       | 18                                  | 7   | 10  | 8                                  | 5    | 22   | 61.4                       | 30.0     | 0.0002            |
| Shaat et al. (2005)                | IRS1    | rs1801278  | T            | 587                    | 1189     | 4                                   | 49  | 534 | 0                                  | 111  | 1078 | 4.9                        | 4.7      | 0.11              |
|                                    | KCNJ11  | rs5219     | T            | 588                    | 1180     | 93                                  | 310 | 185 | 164                                | 576  | 440  | 42.2                       | 38.3     | 0.27              |
| Fallucca et al. (2006)             | IRS1    | rs1801278  | T            | 309                    | 277      | 4                                   | 34  | 271 | 0                                  | 22   | 255  | 6.8                        | 4.0      | 1.00              |
|                                    | ADRB3   | rs4994     | G            | 309                    | 277      | 2                                   | 35  | 272 | 0                                  | 29   | 248  | 6.3                        | 5.2      | 1.00              |
| Shaat et al. (2006)                | GCK     | rs1799884  | T            | 642                    | 1229     | 26                                  | 181 | 435 | 24                                 | 316  | 889  | 18.1                       | 14.8     | 0.57              |
| Tok et al. (2006a)                 | IRS1    | rs1801278  | T            | 62                     | 100      | 0                                   | 9   | 53  | 0                                  | 11   | 89   | 7.3                        | 5.5      | 1.00              |
| Tok et al. (2006b)                 | PPARG   | rs1801282  | G            | 62                     | 100      | 0                                   | 12  | 50  | 0                                  | 16   | 84   | 9.7                        | 8.0      | 1.00              |
| Shaat et al. (2007)                | PPARG   | rs1801282  | G            | 637                    | 1232     | 11                                  | 158 | 468 | 16                                 | 298  | 918  | 14.1                       | 13.4     | 0.17              |
|                                    | TCF7L2  | rs7903146  | T            | 585                    | 1111     | 59                                  | 255 | 271 | 69                                 | 392  | 650  | 31.9                       | 23.9     | 0.36              |
|                                    | ADRB3   | rs4994     | G            | 639                    | 1227     | 5                                   | 100 | 534 | 9                                  | 158  | 1060 | 8.6                        | 7.2      | 0.28              |
| Watanabe et al. (2007)             | TCF7L2  | rs12255372 | T            | 94                     | 58       | —                                   | —   | —   | —                                  | —    | —    | 39.4                       | 20.7     | NA <sup>b</sup>   |
| Cho et al. (2009)                  | CDKAL1  | rs7754840  | C            | 863                    | 630      | 303                                 | 389 | 171 | 133                                | 319  | 178  | 57.6                       | 46.4     | 0.69              |
|                                    | IGF2BP2 | rs4402960  | T            | 857                    | 627      | 103                                 | 365 | 389 | 57                                 | 257  | 313  | 33.3                       | 29.6     | 0.70              |
|                                    | KCNJ11  | rs5219     | T            | 846                    | 629      | 141                                 | 407 | 298 | 102                                | 273  | 254  | 40.7                       | 37.9     | 0.05              |
|                                    | PPARG   | rs1801282  | G            | 865                    | 632      | 1                                   | 71  | 793 | 2                                  | 63   | 567  | 4.2                        | 5.3      | 0.69              |
|                                    | TCF7L2  | rs7903146  | T            | 868                    | 627      | 2                                   | 63  | 803 | 0                                  | 31   | 596  | 3.9                        | 2.5      | 1.00              |
|                                    | TCF7L2  | rs12255372 | T            | 867                    | 630      | 0                                   | 7   | 860 | 0                                  | 2    | 628  | 0.4                        | 0.2      | 1.00              |
| Lauenborg et al. (2009)            | IGF2BP2 | rs4402960  | T            | 274                    | 2334     | 27                                  | 132 | 115 | 224                                | 972  | 1138 | 33.9                       | 30.4     | 0.43              |
|                                    | KCNJ11  | rs5219     | T            | 255                    | 2411     | 40                                  | 124 | 91  | 325                                | 1101 | 985  | 40.0                       | 36.3     | 0.54              |
|                                    | PPARG   | rs1801282  | G            | 265                    | 2383     | 4                                   | 60  | 201 | 51                                 | 542  | 1790 | 12.8                       | 13.5     | 0.19              |
|                                    | TCF7L2  | rs7903146  | T            | 276                    | 2353     | 33                                  | 125 | 118 | 198                                | 863  | 1292 | 34.6                       | 26.8     | 0.002             |
| Cheng et al. (2010)                | PPARG   | rs1801282  | G            | 55                     | 173      | 0                                   | 3   | 52  | 0                                  | 16   | 157  | 2.7                        | 4.6      | 1.00              |
| Freathy et al. (2010) (Caucasians) | GCK     | rs1799884  | T            | 614                    | 3197     | 32                                  | 194 | 388 | 90                                 | 920  | 2187 | 21.0                       | 17.2     | 0.62              |
|                                    | TCF7L2  | rs7903146  | T            | 614                    | 3197     | 75                                  | 246 | 293 | 295                                | 1311 | 1591 | 32.2                       | 29.7     | 0.29              |
| Freathy et al. (2010) (Asians)     | GCK     | rs1799884  | T            | 384                    | 1322     | 5                                   | 91  | 288 | 15                                 | 220  | 1087 | 13.2                       | 9.5      | 0.33              |
|                                    | TCF7L2  | rs7903146  | T            | 384                    | 1322     | 0                                   | 46  | 338 | 3                                  | 108  | 1211 | 6.0                        | 4.3      | 0.73              |
| Montazeri et al. (2010)            | TNF     | rs1800629  | A            | 110                    | 102      | 3                                   | 4   | 103 | 2                                  | 6    | 94   | 4.5                        | 4.9      | 0.01              |
| Santos et al. (2010)               | GCK     | rs1799884  | T            | 150                    | 600      | 8                                   | 56  | 86  | 27                                 | 186  | 387  | 24.0                       | 20.0     | 0.44              |
| Heude et al. (2011)                | PPARG   | rs1801282  | G            | 109                    | 1587     | 0                                   | 17  | 92  | 17                                 | 305  | 1265 | 7.8                        | 10.7     | 0.80 <sup>c</sup> |
| Kim et al. (2011)                  | MTNR1B  | rs1387153  | T            | 909                    | 972      | 241                                 | 433 | 235 | 204                                | 455  | 313  | 50.3                       | 44.4     | 0.10              |
|                                    | MTNR1B  | rs10830963 | G            | 908                    | 966      | 256                                 | 435 | 217 | 203                                | 469  | 294  | 52.1                       | 45.3     | 0.56              |

|                                         |         |            |   |      |      |     |     |     |     |     |     |      |      |                 |
|-----------------------------------------|---------|------------|---|------|------|-----|-----|-----|-----|-----|-----|------|------|-----------------|
| Papadopoulou <i>et al.</i> (2011)       | TCF7L2  | rs7903146  | T | 803  | 1110 | 88  | 352 | 363 | 82  | 384 | 644 | 32.9 | 24.7 | 0.02            |
|                                         | TCF7L2  | rs12255372 | T | 801  | 1102 | 81  | 333 | 387 | 84  | 385 | 633 | 30.9 | 25.1 | 0.02            |
| Pappa <i>et al.</i> (2011)              | IRS1    | rs1801278  | T | 148  | 107  | 17  | 73  | 58  | 7   | 40  | 60  | 36.1 | 25.2 | 1.00            |
|                                         | KCNJ11  | rs5219     | T | 148  | 107  | 10  | 42  | 96  | 4   | 33  | 70  | 20.9 | 19.2 | 1.00            |
|                                         | PPARG   | rs1801282  | G | 148  | 107  | 0   | 5   | 143 | 0   | 7   | 100 | 1.7  | 3.3  | 1.00            |
|                                         | TCF7L2  | rs7903146  | T | 148  | 107  | 18  | 81  | 49  | 7   | 38  | 62  | 39.5 | 24.3 | 0.79            |
| Wang <i>et al.</i> (2011)               | CDKAL1  | rs7754840  | C | 697  | 1020 | 159 | 339 | 199 | 197 | 512 | 311 | 47.1 | 44.4 | 0.61            |
|                                         | IGF2BP2 | rs4402960  | T | 705  | 1025 | 56  | 278 | 371 | 59  | 361 | 605 | 27.7 | 23.4 | 0.60            |
|                                         | MTNR1B  | rs10830963 | G | 700  | 1029 | 137 | 364 | 199 | 191 | 509 | 329 | 45.6 | 43.3 | 0.85            |
| Gueuvoghlian-Silva <i>et al.</i> (2012) | TNF     | rs1800629  | A | 79   | 168  | 2   | 18  | 59  | 4   | 31  | 133 | 13.9 | 11.6 | 0.24            |
| Kwak <i>et al.</i> (2012)               | CDKAL1  | rs7754840  | C | 1399 | 2025 | —   | —   | —   | —   | —   | —   | 56.2 | 45.4 | NA <sup>b</sup> |
|                                         | MTNR1B  | rs1387153  | T | 468  | 1242 | —   | —   | —   | —   | —   | —   | 51.1 | 43.3 | NA <sup>b</sup> |
|                                         | TCF7L2  | rs7903146  | T | 468  | 1242 | —   | —   | —   | —   | —   | —   | 4.1  | 2.7  | NA <sup>b</sup> |
| Vcelak <i>et al.</i> (2012)             | TCF7L2  | rs7903146  | T | 260  | 376  | 24  | 128 | 108 | 24  | 147 | 205 | 33.8 | 25.9 | 0.79            |
|                                         | TCF7L2  | rs12255372 | T | 260  | 376  | 22  | 115 | 123 | 23  | 147 | 206 | 30.6 | 25.7 | 0.69            |
| Vlassi <i>et al.</i> (2012)             | MTNR1B  | rs1387153  | T | 77   | 98   | 12  | 26  | 39  | 11  | 35  | 52  | 32.5 | 29.1 | 0.22            |
|                                         | MTNR1B  | rs10830963 | G | 77   | 98   | 16  | 31  | 30  | 12  | 30  | 56  | 40.9 | 27.6 | 0.02            |

<sup>a</sup>Allele A indicates the minor allele.

<sup>b</sup>No available data for the calculation of HWE test.

<sup>c</sup>P-value for the HWE test of the whole cohort.

<sup>d</sup>The data of Caucasians were updated by Shaat *et al.* (2007) and therefore they were not included here.



**Table IV** Associations between genetic variants and GDM risk in the systematic review and meta-analyses

| Gene           | Variant    | Minor allele | Number of studies | Sample size (cases/controls) | OR (95% CI) <sup>a</sup> | P-value | Heterogeneity                                                  |
|----------------|------------|--------------|-------------------|------------------------------|--------------------------|---------|----------------------------------------------------------------|
| <i>TCF7L2</i>  | rs7903146  | T            | 9 <sup>b</sup>    | 4406/11 445                  | 1.44 (1.29–1.60)         | <0.001  | <i>I</i> <sup>2</sup> = 51.3%; <i>P</i> <sub>Het</sub> = 0.037 |
| <i>TCF7L2</i>  | rs12255372 | T            | 4                 | 2022/2166                    | 1.46 (1.15–1.84)         | 0.002   | <i>I</i> <sup>2</sup> = 48.3%; <i>P</i> <sub>Het</sub> = 0.122 |
| <i>GCK</i>     | rs1799884  | T            | 6 <sup>b</sup>    | 1934/6492                    | 1.29 (1.17–1.42)         | <0.001  | <i>I</i> <sup>2</sup> = 0.0%; <i>P</i> <sub>Het</sub> = 0.878  |
| <i>KCNJ11</i>  | rs5219     | T            | 4                 | 1837/4327                    | 1.15 (1.06–1.26)         | 0.002   | <i>I</i> <sup>2</sup> = 0.0%; <i>P</i> <sub>Het</sub> = 0.976  |
| <i>CDKAL1</i>  | rs7754840  | C            | 3                 | 2959/3675                    | 1.40 (1.13–1.72)         | 0.002   | <i>I</i> <sup>2</sup> = 88.1%; <i>P</i> <sub>Het</sub> < 0.001 |
| <i>IGF2BP2</i> | rs4402960  | T            | 3                 | 1836/3986                    | 1.21 (1.10–1.33)         | <0.001  | <i>I</i> <sup>2</sup> = 0.0%; <i>P</i> <sub>Het</sub> = 0.842  |
| <i>MTNR1B</i>  | rs1387153  | T            | 3                 | 1454/2312                    | 1.30 (1.18–1.43)         | <0.001  | <i>I</i> <sup>2</sup> = 0.0%; <i>P</i> <sub>Het</sub> = 0.691  |
| <i>MTNR1B</i>  | rs10830963 | G            | 3                 | 1685/2093                    | 1.28 (1.05–1.55)         | 0.016   | <i>I</i> <sup>2</sup> = 70.2%; <i>P</i> <sub>Het</sub> = 0.035 |
| <i>PPARG</i>   | rs1801282  | G            | 8                 | 2241/6336                    | 0.94 (0.82–1.07)         | 0.322   | <i>I</i> <sup>2</sup> = 0.0%; <i>P</i> <sub>Het</sub> = 0.450  |
| <i>IRS1</i>    | rs1801278  | T            | 4                 | 1106/1673                    | 1.39 (1.04–1.85)         | 0.027   | <i>I</i> <sup>2</sup> = 34.5%; <i>P</i> <sub>Het</sub> = 0.205 |
| <i>ADRB3</i>   | rs4994     | G            | 5                 | 1239/2002                    | 1.20 (0.88–1.65)         | 0.252   | <i>I</i> <sup>2</sup> = 38.8%; <i>P</i> <sub>Het</sub> = 0.163 |
| <i>TNF</i>     | rs1800629  | A            | 3                 | 224/305                      | 1.64 (0.73–3.69)         | 0.228   | <i>I</i> <sup>2</sup> = 74.3%; <i>P</i> <sub>Het</sub> = 0.020 |

<sup>a</sup>ORs were calculated based on allelic model.  
<sup>b</sup>The study by Freathy et al. included two independent study populations.

contrast, only two genes (*PPARG* and *IRS1*) are relevant to insulin resistance (Petrie et al., 2011), and only the *IRS1* variant is significantly associated with GDM risk. These findings suggest that inherited abnormalities of pancreatic islet  $\beta$ -cell function and/or  $\beta$ -cell mass may be implicated in the etiology of GDM.

All genetic loci associated with GDM risk (i.e. *TCF7L2*, *GCK*, *KCNJ11*, *CDKAL1*, *IGF2BP2* and *MTNR1B*) in our systematic review have been previously related to the risk of T2DM (Frayling, 2007; McCarthy, 2010). The effect size of the associations between these SNPs and GDM was similar to those in the studies of T2DM. Moreover, in a recent genome-wide association study of GDM (Kwak et al., 2012), among the 11 variants significantly associated with GDM risk, five SNPs were located in or near the known T2DM loci. In addition, two variants that reached the genome-wide significance level ( $P < 5 \times 10^{-8}$ ), rs7754840 in *CDKAL1* and rs10830962 near *MTNR1B*, were identical or in strong LD with known T2DM variants (Kwak et al., 2012). These findings suggest an at least partly shared genetic basis between GDM and T2DM, which is not surprising given that both insulin resistance and defects in insulin secretion play key roles in the etiology of both GDM and T2DM. In addition, women with a history of GDM have a more than 7-fold risk of developing T2DM later in life (Bellamy et al., 2009).

It should be noted that not all women who have a history of GDM develop T2DM. Different from T2DM, GDM as a pregnancy complication may be influenced by not only the maternal genome but also the paternal and fetal genomes. Indeed, emerging data suggest both fetal and paternal genotypes may affect glucose metabolism in pregnancy. For example, Wangler et al. (2005) observed that mothers carrying offspring with Beckwith–Wiedemann syndrome, in which probands have abnormally increased *IGF2* expression, showed a trend toward an increased risk of GDM. Also, in an animal study by Petry et al. (2010), maternal glucose concentrations in pregnant mice were elevated among women carrying pups with targeted disruption of maternally transmitted fetal *H19<sup>Δ13</sup>*, which implied that variable fetal *IGF2* expression could affect risk for GDM. Moreover, in an

epidemiological study among 1160 mother/partner/offspring trios from the UK, Petry et al. found that polymorphic variations in the paternally transmitted fetal *IGF2* genotype, but not the maternal or maternally transmitted fetal *IGF2* genotypes, were associated with increased maternal glucose concentrations in pregnancy, which could potentially alter the risk of maternal GDM (Petry et al., 2011). These studies highlighted a potential role of the paternal and fetal genomes, in addition to the maternal genome itself, in maternal glucose homeostasis during pregnancy. Future genetic studies of GDM considering fetal and/or paternal genome are warranted.

Gene–gene and gene–environment interactions may further help illustrate the biological basis for complex diseases and provide important clues for personalized interventions or clinical therapeutics (Collins et al., 2003). These interactions contribute to  $\beta$ -cell function (Nesher et al., 1999; Li et al., 2009), insulin sensitivity (Black et al., 2008) and T2DM risk (Cornelis and Hu, 2012). Further, a number of environmental factors, such as diet and lifestyle factors, have been significantly associated with GDM risk (Zhang and Ning, 2011). However, so far little has been done to investigate gene–environmental interactions in relation to GDM susceptibility. Watanabe et al. (2007) found that the *TCF7L2* rs12255372 variant interacts with adiposity to alter insulin secretion in 132 Mexican-American families of a proband with previous GDM. In a recent study of 826 GDM cases and 1185 healthy controls, Papadopoulou et al. (2011) examined the interaction between *TCF7L2* and *HLA-DQB1\*0602* variants in association with GDM risk in Swedish women, but observed no interaction between them. Future studies with larger sample sizes are warranted to better understand these complex interactions in the pathogenesis of GDM.

The strength of the present study is the systematic way in which we have summarized results of the available studies on SNP–GDM associations. However, our analysis has several limitations. First, although the pooled sample size for some SNPs (e.g. rs7903146 in *TCF7L2*) was relatively large, for others it was small (e.g. for rs1800629 in *TNF*, 224 cases and 305 controls). Secondly, we focused on the

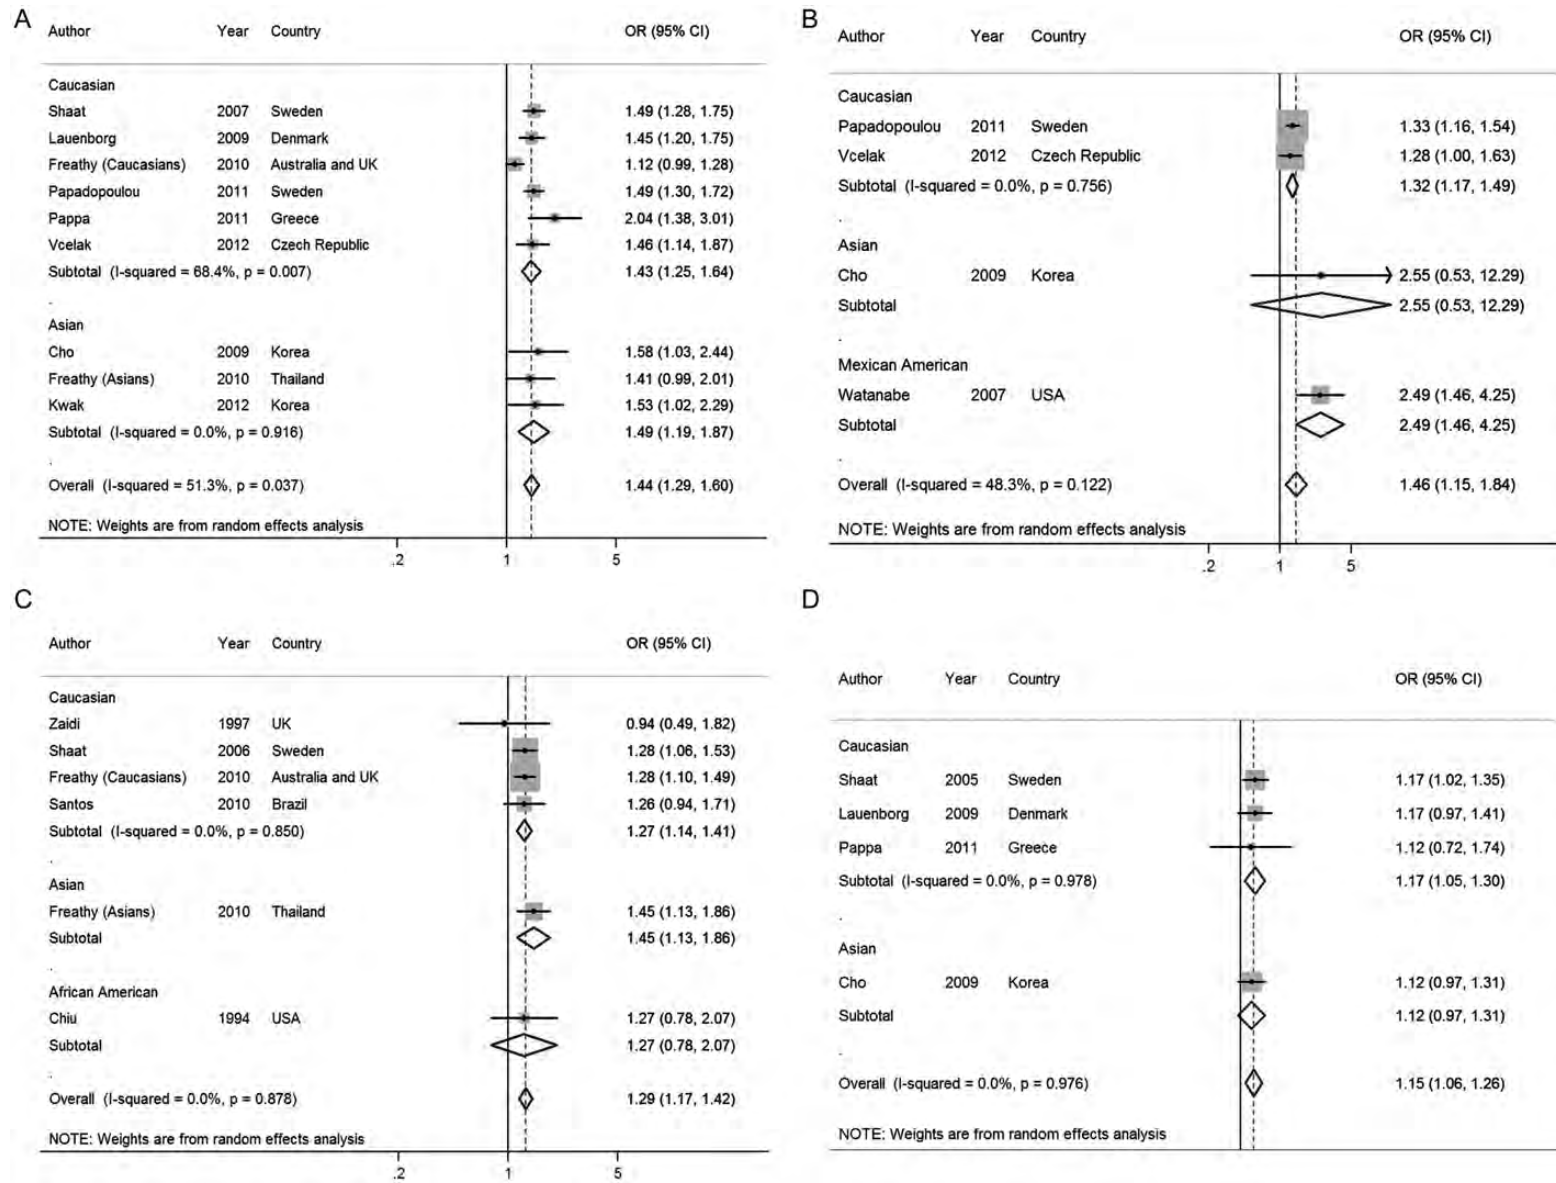

**Figure 2 (A–H)** The risk of GDM in association with genetic variants related to insulin secretion. (A) TCF7L2 rs7903146, (B) TCF7L2 rs1225372, (C) GCK rs1799884, (D) KCNJ11 rs5219, (E) CDAL1 rs7754840 (all Asians), (F) IGF2BP2 rs4402960, (G) MTNR1B rs1387153 and (H) MTNR1B rs10830963. The shadowed squares and their lateral tips indicate the ORs and the corresponding 95% CIs in individual studies, with the sizes of squares proportional to weights used in the meta-analyses. The central lines and lateral tips of the diamonds indicate the pooled ORs and the corresponding 95% CIs. The solid vertical lines indicate no effect.

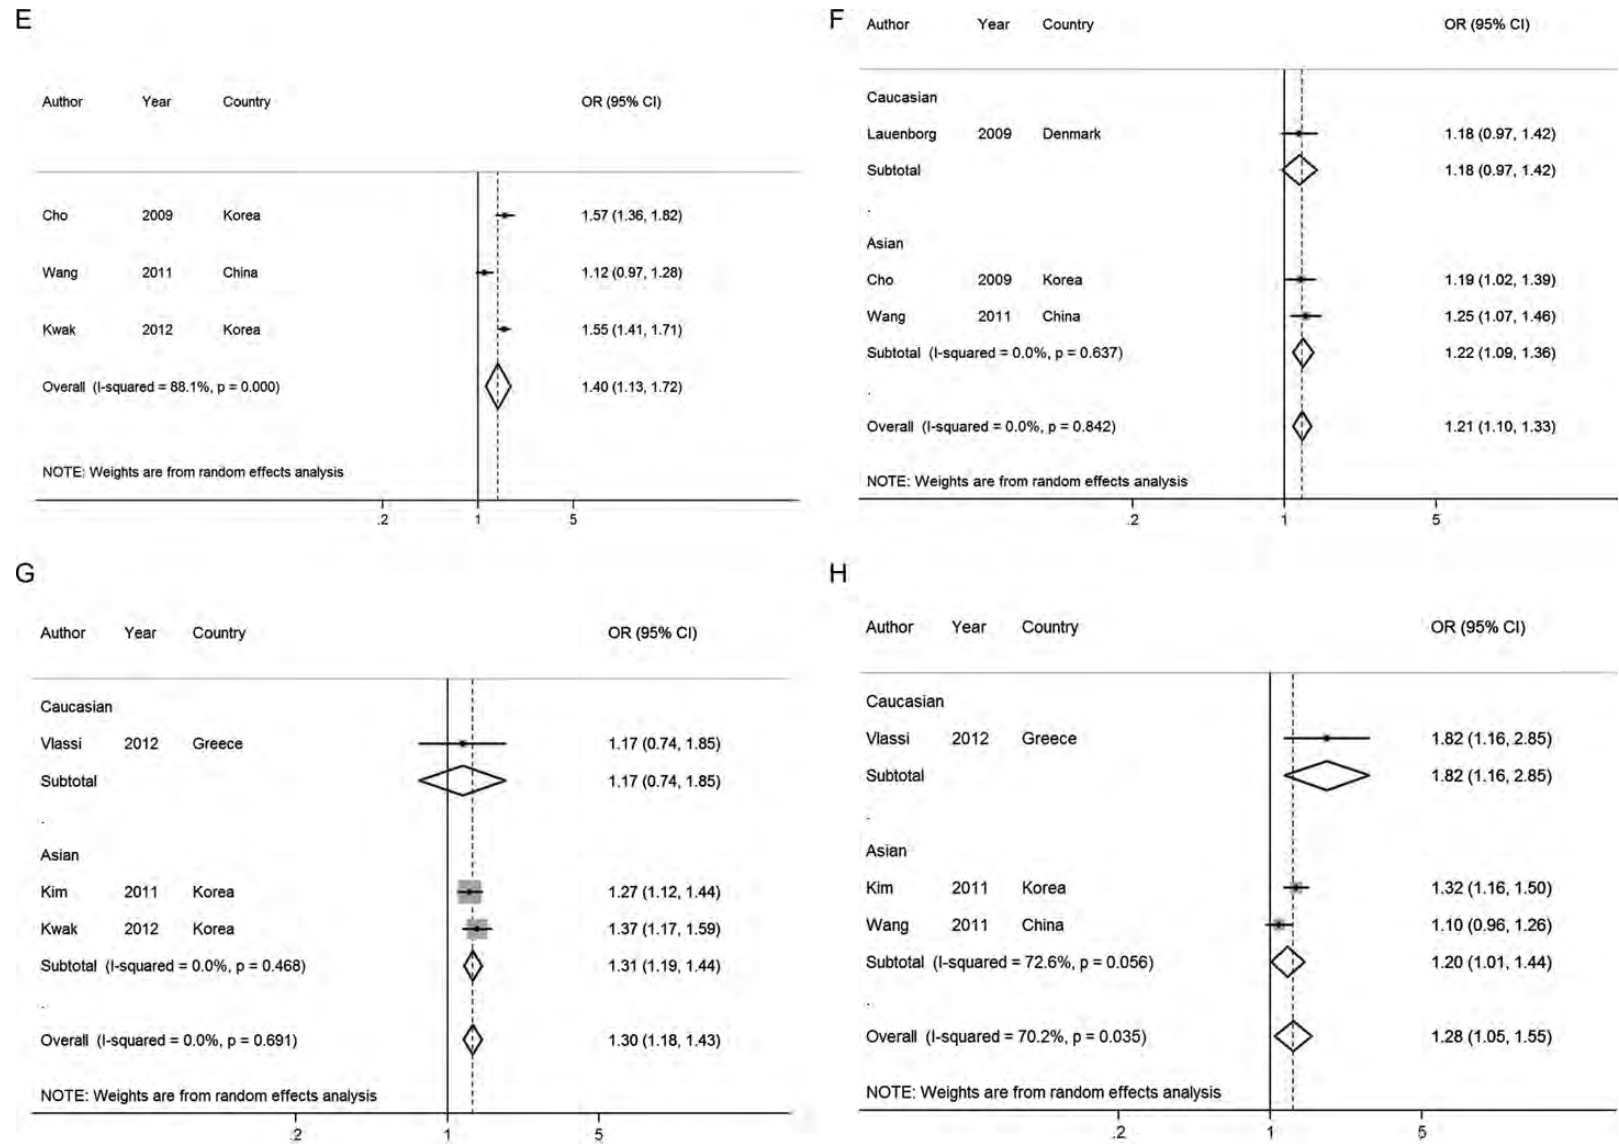

Figure 2 Continued

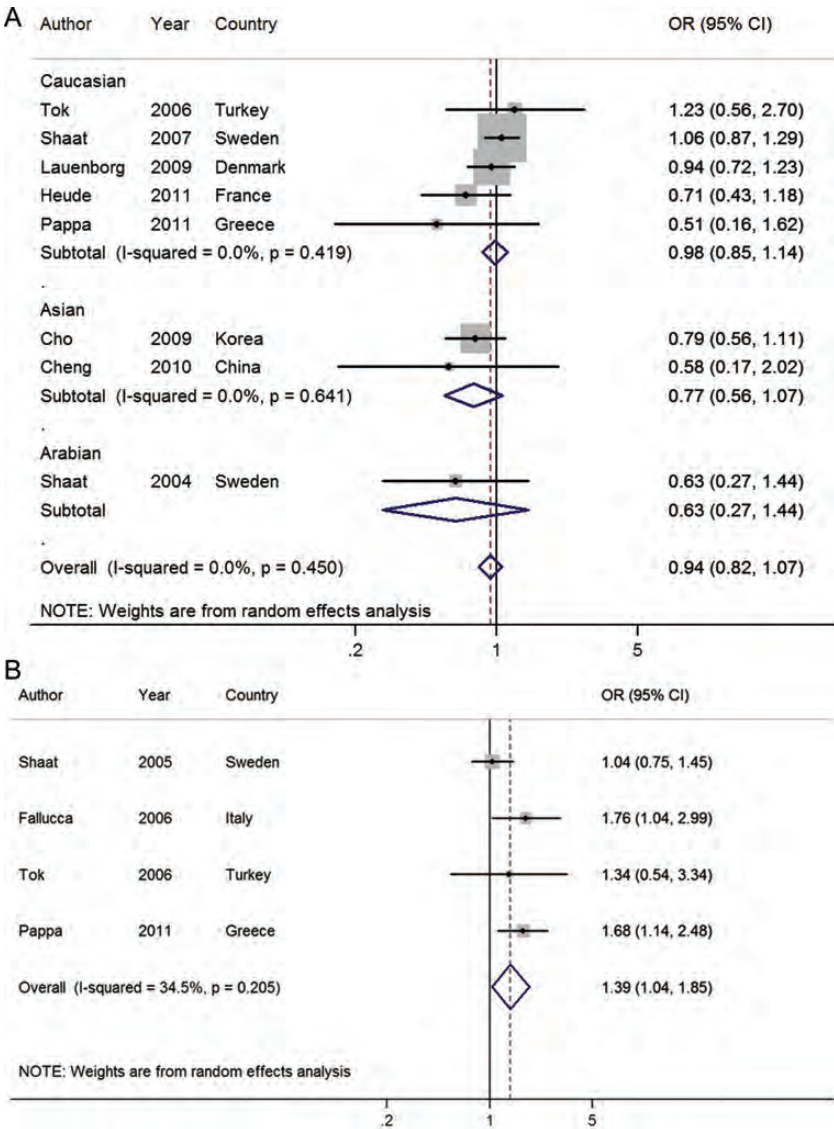

**Figure 3 (A and B)** The risk of GDM in association with genetic variants related to insulin resistance. (A) PPARG rs1801282 and (B) IRS1 rs1801278 (all Caucasians). The shadowed squares and their lateral tips indicate the ORs and the corresponding 95% CIs in individual studies, with the sizes of squares proportional to weights used in the meta-analyses. The central lines and lateral tips of the diamonds indicate the pooled ORs and the corresponding 95% CIs. The solid vertical lines indicate no effect.

commonly studied SNP–GDM associations (those investigated in at least three independent studies), which allowed us to conduct a meta-analysis and systematic review. However, we may have missed loci with two or less published results for a specific variant, such as the type 2 diabetes-associated common genetic variants (e.g. *FTO*, *SLC30A8*, *HHEX/IDE*, etc.) and type 1 diabetes-associated genetic variants (e.g. *HLA*, etc.). Their associations with GDM risk warrant further evaluation when more evidence becomes available. Thirdly, although the statistical test showed no indication of publication bias for any SNPs included in the meta-analysis, we cannot rule out the possibility of publication bias due to the small number of studies. Fourthly, potential confounding effects from other major risk factors of GDM, such as BMI, on the observed SNP-GDM association was not explicitly

investigated in the present review due to the fact that not all eligible studies adjusted for these risk factors and we intended to maximize the number of eligible studies that can be included in the systematic review. Nevertheless, as none of the genetic variants investigated in the review is consistently associated with BMI, the effect of BMI on the association of the selected genetic variants and GDM risk is likely to be minor. In addition, Asian, Hispanic and Native American women, when compared with non-Hispanic White women, have an increased risk of GDM (Ben-Haroush *et al.*, 2004). However, genetic studies of GDM among these high-risk populations are sparse, which limited the capacity of exploring the gene-GDM association by race/ethnicity groups. Future studies among non-Caucasian populations are warranted. It should also be noted that



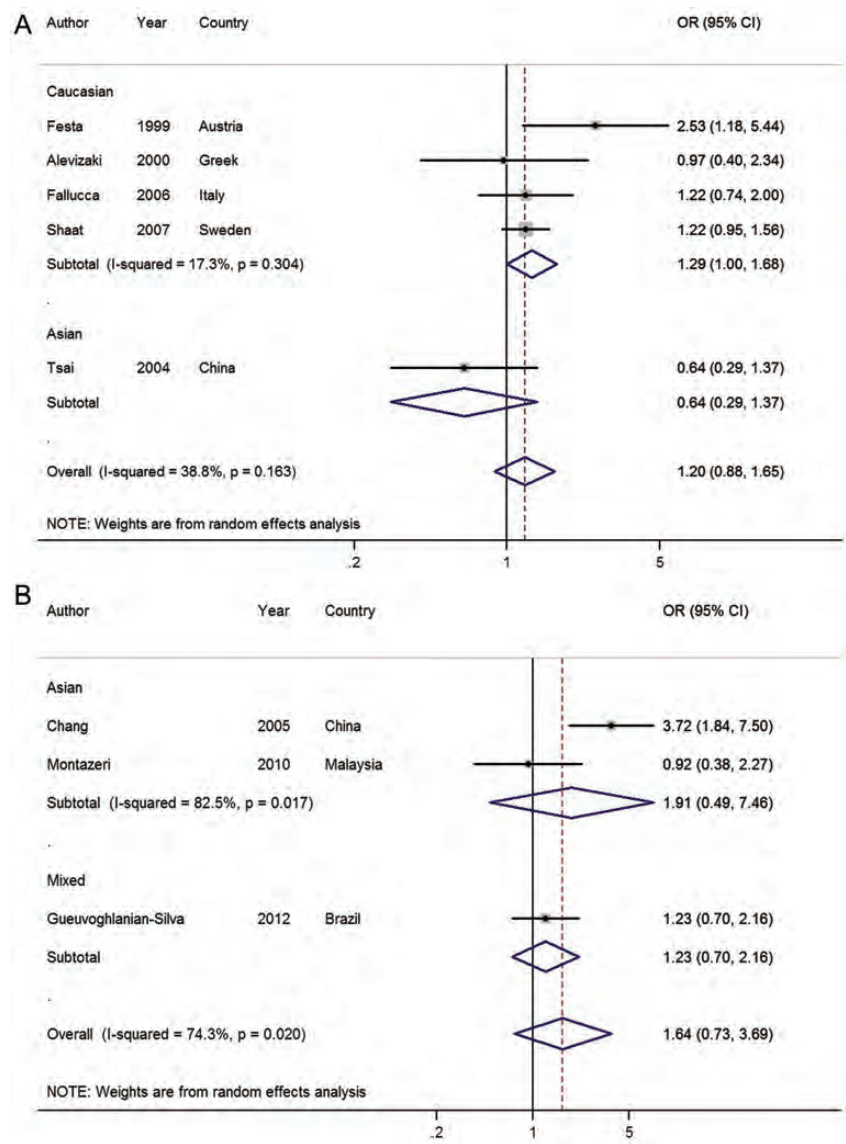

**Figure 4 (A and B)** The risk of GDM in association with genetic variants related to other pathways. (A) ADRB3 rs4994 (energy metabolism) and (B) TNF rs1800629 (inflammation). The shadowed squares and their lateral tips indicate the ORs and the corresponding 95% CIs in individual studies, with the sizes of squares proportional to weights used in the meta-analyses. The central lines and lateral tips of the diamonds indicate the pooled ORs and the corresponding 95% CIs. The solid vertical lines indicate no effect.

current definition of GDM does not reach consensus and the diagnosis criteria for GDM in the included studies were different. In general, the trend of the diagnosis criteria for GDM becomes less stringent.

In summary, in this systematic review, we observed evidence for significant associations of GDM with nine SNPs from seven genes. Among the seven genes, six were related to insulin secretion and one was related to insulin resistance, which supports an important role of pancreatic islet  $\beta$ -cell compensation in the pathogenesis of GDM. Genetic studies of GDM considering fetal and/or paternal genome, and gene–gene and gene–environmental interactions and among non-Caucasian populations are sparse. Future studies in these regards are warranted for better understanding the etiology of GDM.

Acknowledgements

The authors thank William L Lowe Jr., MD, professor in Medicine-Endocrinology, and colleagues for providing us with their data.

Authors' roles

W.B.: study concept and design, acquisition of data, data analysis, interpretation of data, drafting the manuscript, final approval of the manuscript. Y.R.: acquisition of data, data analysis, critically reviewing the manuscript, final approval of the manuscript. K.B., E.Y., H.Y. and M.K.: interpretation of data, critically reviewing the manuscript, final approval of the manuscript. C.Z.: study concept and design,



supervision of data acquisition and analysis, interpretation of data, drafting the manuscript, critically reviewing the manuscript, final approval of the manuscript.

## Funding

W.B., K.B., E.Y., M.K. and C.Z. are supported by the Intramural Research Program of the Eunice Kennedy Shriver National Institute of Child Health and Human Development, National Institutes of Health.

## Conflict of interest

The authors declared no conflict of interest.

## References

- Alevizaki M, Thalassinou L, Grigorakis SI, Philippou G, Lili K, Souvatzoglou A, Anastasiou E. Study of the Trp64Arg polymorphism of the beta3-adrenergic receptor in Greek women with gestational diabetes. *Diabetes Care* 2000; **23**:1079–1083.
- American Diabetes Association. Gestational diabetes mellitus. *Diabetes Care* 2004; **27**(Suppl 1):S88–S90.
- Bals-Pratsch M, Grosser B, Seifert B, Ortmann O, Seifarth C. Early onset and high prevalence of gestational diabetes in PCOS and insulin resistant women before and after assisted reproduction. *Exp Clin Endocrinol Diabetes* 2011; **119**:338–342.
- Bauer T, Bouman HJ, van Werkum JW, Ford NF, ten Berg JM, Taubert D. Impact of CYP2C19 variant genotypes on clinical efficacy of antiplatelet treatment with clopidogrel: systematic review and meta-analysis. *Br Med J* 2011; **343**:d4588.
- Bellamy L, Casas JP, Hingorani AD, Williams D. Type 2 diabetes mellitus after gestational diabetes: a systematic review and meta-analysis. *Lancet* 2009; **373**:1773–1779.
- Ben-Haroush A, Yogev Y, Hod M. Epidemiology of gestational diabetes mellitus and its association with Type 2 diabetes. *Diabet Med* 2004; **21**:103–113.
- Black MH, Fingerlin TE, Allayee H, Zhang W, Xiang AH, Trigo E, Hartiala J, Lehtinen AB, Haffner SM, Bergman RN et al. Evidence of interaction between PPARG2 and HNF4A contributing to variation in insulin sensitivity in Mexican Americans. *Diabetes* 2008; **57**:1048–1056.
- Boomsma CM, Eijkemans MJ, Hughes EG, Visser GH, Fauser BC, Macklon NS. A meta-analysis of pregnancy outcomes in women with polycystic ovary syndrome. *Hum Reprod Update* 2006; **12**:673–683.
- Buchanan TA, Xiang AH. Gestational diabetes mellitus. *J Clin Invest* 2005; **115**:485–491.
- Chang Y, Niu XM, Qi XM, Zhang HY, Li NJ, Luo Y. Study on the association between gestational diabetes mellitus and tumor necrosis factor-alpha gene polymorphism. *Zhonghua Fu Chan Ke Za Zhi* 2005; **40**:676–678.
- Cheng Y, Ma Y, Peng T, Wang J, Lin R, Cheng HD. Genotype discrepancy between maternal and fetal Pro12Ala polymorphism of PPARG2 gene and its association with gestational diabetes mellitus. *Zhonghua Fu Chan Ke Za Zhi* 2010; **45**:170–173.
- Chiu KC, Go RC, Aoki M, Riggs AC, Tanizawa Y, Acton RT, Bell DS, Goldenberg RL, Roseman JM, Permutt MA. Glucokinase gene in gestational diabetes mellitus: population association study and molecular scanning. *Diabetologia* 1994; **37**:104–110.
- Cho YM, Kim TH, Lim S, Choi SH, Shin HD, Lee HK, Park KS, Jang HC. Type 2 diabetes-associated genetic variants discovered in the recent genome-wide association studies are related to gestational diabetes mellitus in the Korean population. *Diabetologia* 2009; **52**:253–261.
- Collins FS, Green ED, Guttmacher AE, Guyer MS. A vision for the future of genomics research. *Nature* 2003; **422**:835–847.
- Cornelis MC, Hu FB. Gene-environment interactions in the development of type 2 diabetes: recent progress and continuing challenges. *Annu Rev Nutr* 2012; **32**:245–259.
- DerSimonian R, Laird N. Meta-analysis in clinical trials. *Control Clin Trials* 1986; **7**:177–188.
- Di Cianni G, Miccoli R, Volpe L, Lencioni C, Del Prato S. Intermediate metabolism in normal pregnancy and in gestational diabetes. *Diabetes Metab Res Rev* 2003; **19**:259–270.
- Egger M, Davey Smith G, Schneider M, Minder C. Bias in meta-analysis detected by a simple, graphical test. *Br Med J* 1997; **315**:629–634.
- Fallucca F, Dalfra MG, Sciuillo E, Masin M, Buongiorno AM, Napoli A, Fedele D, Lapolla A. Polymorphisms of insulin receptor substrate 1 and beta3-adrenergic receptor genes in gestational diabetes and normal pregnancy. *Metabolism* 2006; **55**:1451–1456.
- Ferrara A. Increasing prevalence of gestational diabetes mellitus: a public health perspective. *Diabetes Care* 2007; **30**(Suppl 2):S141–S146.
- Festa A, Krugluger W, Shnawa N, Hopmeier P, Haffner SM, Scherthaner G. Trp64Arg polymorphism of the beta3-adrenergic receptor gene in pregnancy: association with mild gestational diabetes mellitus. *J Clin Endocrinol Metab* 1999; **84**:1695–1699.
- Frayling TM. Genome-wide association studies provide new insights into type 2 diabetes aetiology. *Nat Rev Genet* 2007; **8**:657–662.
- Freathy RM, Hayes MG, Urbanek M, Lowe LP, Lee H, Ackerman C, Frayling TM, Cox NJ, Dunger DB, Dyer AR et al. Hyperglycemia and Adverse Pregnancy Outcome (HAPO) study: common genetic variants in GCK and TCF7L2 are associated with fasting and postchallenge glucose levels in pregnancy and with the new consensus definition of gestational diabetes mellitus from the International Association of Diabetes and Pregnancy Study Groups. *Diabetes* 2010; **59**:2682–2689.
- Gueuvoghlian-Silva BY, Torloni MR, Mattar R, de Oliveira LS, Scomarini FB, Nakamura MU, Daher S. Profile of inflammatory mediators in gestational diabetes mellitus: phenotype and genotype. *Am J Reprod Immunol* 2012; **67**:241–250.
- Heude B, Pelloux V, Forhan A, Bedel JF, Lacorte JM, Clement K, Charles MA. Association of the Pro12Ala and C1431T variants of PPARGgamma and their haplotypes with susceptibility to gestational diabetes. *J Clin Endocrinol Metab* 2011; **96**:E1656–E1660.
- Higgins JP, Thompson SG, Deeks JJ, Altman DG. Measuring inconsistency in meta-analyses. *Br Med J* 2003; **327**:557–560.
- Jaques AM, Amor DJ, Baker HW, Healy DL, Ukoumunne OC, Breheny S, Garrett C, Halliday JL. Adverse obstetric and perinatal outcomes in subfertile women conceiving without assisted reproductive technologies. *Fertil Steril* 2010; **94**:2674–2679.
- Kim C, Berger DK, Chamany S. Recurrence of gestational diabetes mellitus: a systematic review. *Diabetes Care* 2007; **30**:1314–1319.
- Kim JY, Cheong HS, Park BL, Baik SH, Park S, Lee SW, Kim MH, Chung JH, Choi JS, Kim MY et al. Melatonin receptor 1 B polymorphisms associated with the risk of gestational diabetes mellitus. *BMC Med Genet* 2011; **12**:82.
- Konig M, Shuldiner AR. The genetic interface between gestational diabetes and type 2 diabetes. *J Matern Fetal Neonatal Med* 2012; **25**:36–40.
- Kwak SH, Kim SH, Cho YM, Go MJ, Cho YS, Choi SH, Moon MK, Jung HS, Shin HD, Kang HM et al. A genome-wide association study of gestational diabetes mellitus in Korean women. *Diabetes* 2012; **61**:531–541.
- Lambrinoudaki I, Vlachou SA, Creatsas G. Genetics in gestational diabetes mellitus: association with incidence, severity, pregnancy outcome and response to treatment. *Curr Diabetes Rev* 2010; **6**:393–399.
- Lauenborg J, Grarup N, Damm P, Borch-Johnsen K, Jorgensen T, Pedersen O, Hansen T. Common type 2 diabetes risk gene variants associate with gestational diabetes. *J Clin Endocrinol Metab* 2009; **94**:145–150.
- Li X, Shu YH, Xiang AH, Trigo E, Kuusisto J, Hartiala J, Swift AJ, Kawakubo M, Stringham HM, Bonnycastle LL et al. Additive effects of genetic variation in GCK and G6PC2 on insulin secretion and fasting glucose. *Diabetes* 2009; **58**:2946–2953.
- Mao H, Li Q, Gao S. Meta-analysis of the relationship between common Type 2 diabetes risk gene variants with gestational diabetes mellitus. *PLoS One* 2012; **7**:e45882.
- Martin AO, Simpson JL, Ober C, Freinkel N. Frequency of diabetes mellitus in mothers of probands with gestational diabetes: possible maternal influence on the predisposition to gestational diabetes. *Am J Obstet Gynecol* 1985; **151**:471–475.

- McCarthy ML. Genomics, type 2 diabetes, and obesity. *N Engl J Med* 2010; **363**:2339–2350.
- Montazeri S, Nalliah S, Radhakrishnan AK. Is there a genetic variation association in the IL-10 and TNF alpha promoter gene with gestational diabetes mellitus? *Hereditas* 2010; **147**:94–102.
- Nesher R, Gross DJ, Donath MY, Cerasi E, Kaiser N. Interaction between genetic and dietary factors determines beta-cell function in *Psammomys obesus*, an animal model of type 2 diabetes. *Diabetes* 1999; **48**:731–737.
- Palomaki GE, Melillo S, Bradley LA. Association between 9p21 genomic markers and heart disease: a meta-analysis. *J Am Med Assoc* 2010; **303**:648–656.
- Papadopoulou A, Lynch KF, Shaat N, Hakansson R, Ivarsson SA, Berntorp K, Agardh CD, Lernmark A. Gestational diabetes mellitus is associated with TCF7L2 gene polymorphisms independent of HLA-DQB1\*0602 genotypes and islet cell autoantibodies. *Diabet Med* 2011; **28**:1018–1027.
- Pappa KI, Gazouli M, Economou K, Daskalakis G, Anastasiou E, Anagnostou NP, Antsaklis A. Gestational diabetes mellitus shares polymorphisms of genes associated with insulin resistance and type 2 diabetes in the Greek population. *Gynecol Endocrinol* 2011; **27**:267–272.
- Petrie JR, Pearson ER, Sutherland C. Implications of genome wide association studies for the understanding of type 2 diabetes pathophysiology. *Biochem Pharmacol* 2011; **81**:471–477.
- Petry CJ, Evans ML, Wingate DL, Ong KK, Reik W, Constancia M, Dunger DB. Raised late pregnancy glucose concentrations in mice carrying pups with targeted disruption of H19delta13. *Diabetes* 2010; **59**:282–286.
- Petry CJ, Seear RV, Wingate DL, Manico L, Acerini CL, Ong KK, Hughes IA, Dunger DB. Associations between paternally transmitted fetal IGF2 variants and maternal circulating glucose concentrations in pregnancy. *Diabetes* 2011; **60**:3090–3096.
- Poulsen P, Levin K, Petersen I, Christensen K, Beck-Nielsen H, Vaag A. Heritability of insulin secretion, peripheral and hepatic insulin action, and intracellular glucose partitioning in young and old Danish twins. *Diabetes* 2005; **54**:275–283.
- Povel CM, Boer JM, Reiling E, Feskens EJ. Genetic variants and the metabolic syndrome: a systematic review. *Obes Rev* 2011; **12**:952–967.
- Reece EA, Leguizamon G, Wiznitzer A. Gestational diabetes: the need for a common ground. *Lancet* 2009; **373**:1789–1797.
- Reyes-Munoz E, Castellanos-Barroso G, Ramirez-Eugenio BY, Ortega-Gonzalez C, Parra A, Castillo-Mora A, De la Jara-Diaz JF. The risk of gestational diabetes mellitus among Mexican women with a history of infertility and polycystic ovary syndrome. *Fertil Steril* 2012; **97**:1467–1471.
- Robitaille J, Grant AM. The genetics of gestational diabetes mellitus: evidence for relationship with type 2 diabetes mellitus. *Genet Med* 2008; **10**:240–250.
- Santos IC, Frigeri HR, Rea RR, Almeida AC, Souza EM, Pedrosa FO, Fadel-Picheth CM, Picheth G. The glucokinase gene promoter polymorphism –30G>A (rs1799884) is associated with fasting glucose in healthy pregnant women but not with gestational diabetes. *Clin Chim Acta* 2010; **411**:892–893.
- Schafer SA, Machicao F, Fritsche A, Haring HU, Kantartzis K. New type 2 diabetes risk genes provide new insights in insulin secretion mechanisms. *Diabetes Res Clin Pract* 2011; **93**(Suppl 1):S9–24.
- Shaat N, Ekelund M, Lernmark A, Ivarsson S, Nilsson A, Perfekt R, Berntorp K, Groop L. Genotypic and phenotypic differences between Arabian and Scandinavian women with gestational diabetes mellitus. *Diabetologia* 2004; **47**:878–884.
- Shaat N, Ekelund M, Lernmark A, Ivarsson S, Almgren P, Berntorp K, Groop L. Association of the E23K polymorphism in the KCNJ11 gene with gestational diabetes mellitus. *Diabetologia* 2005; **48**:2544–2551.
- Shaat N, Karlsson E, Lernmark A, Ivarsson S, Lynch K, Parikh H, Almgren P, Berntorp K, Groop L. Common variants in MODY genes increase the risk of gestational diabetes mellitus. *Diabetologia* 2006; **49**:1545–1551.
- Shaat N, Lernmark A, Karlsson E, Ivarsson S, Parikh H, Berntorp K, Groop L. A variant in the transcription factor 7-like 2 (TCF7L2) gene is associated with an increased risk of gestational diabetes mellitus. *Diabetologia* 2007; **50**:972–979.
- Solomon CG, Willett WC, Carey VJ, Rich-Edwards J, Hunter DJ, Colditz GA, Stampfer MJ, Speizer FE, Spiegelman D, Manson JE. A prospective study of pregravid determinants of gestational diabetes mellitus. *J Am Med Assoc* 1997; **278**:1078–1083.
- Stroup DF, Berlin JA, Morton SC, Olkin I, Williamson GD, Rennie D, Moher D, Becker BJ, Sipe TA, Thacker SB. Meta-analysis of observational studies in epidemiology: a proposal for reporting. Meta-analysis Of Observational Studies in Epidemiology (MOOSE) group. *J Am Med Assoc* 2000; **283**:2008–2012.
- Tok EC, Ertunc D, Bilgin O, Erdal EM, Kaplanoglu M, Dilek S. Association of insulin receptor substrate-1 G972R variant with baseline characteristics of the patients with gestational diabetes mellitus. *Am J Obstet Gynecol* 2006a; **194**:868–872.
- Tok EC, Ertunc D, Bilgin O, Erdal EM, Kaplanoglu M, Dilek S. PPAR-gamma2 Pro12Ala polymorphism is associated with weight gain in women with gestational diabetes mellitus. *Eur J Obstet Gynecol Reprod Biol* 2006b; **129**:25–30.
- Tsai PJ, Ho SC, Tsai LP, Lee YH, Hsu SP, Yang SP, Chu CH, Yu CH. Lack of relationship between beta3-adrenergic receptor gene polymorphism and gestational diabetes mellitus in a Taiwanese population. *Metabolism* 2004; **53**:1136–1139.
- Vcelak J, Vejrazkova D, Vankova M, Lukasova P, Bradnova O, Halkova T, Bestak J, Andelova K, Kvasnickova H, Hoskovcova P et al. T2D risk haplotypes of the TCF7L2 gene in the Czech population sample: the association with FFAs composition. *Physiol Res* 2012; **61**:229–240.
- Vlassi M, Gazouli M, Paltoglou G, Christopoulos P, Florentin L, Kassi G, Mastorakos G. The rs10830963 variant of melatonin receptor MTNR1B is associated with increased risk for gestational diabetes mellitus in a Greek population. *Hormones (Athens)* 2012; **11**:70–76.
- Wang Y, Nie M, Li W, Ping F, Hu Y, Ma L, Gao J, Liu J. Association of six single nucleotide polymorphisms with gestational diabetes mellitus in a Chinese population. *PLoS One* 2011; **6**:e26953.
- Wangler MF, Chang AS, Moley KH, Feinberg AP, Debaun MR. Factors associated with preterm delivery in mothers of children with Beckwith-Wiedemann syndrome: a case cohort study from the BWS registry. *Am J Med Genet Part A* 2005; **134A**:187–191.
- Watanabe RM. Inherited destiny? Genetics and gestational diabetes mellitus. *Genome Med* 2011; **3**:18.
- Watanabe RM, Allayee H, Xiang AH, Trigo E, Hartiala J, Lawrence JM, Buchanan TA. Transcription factor 7-like 2 (TCF7L2) is associated with gestational diabetes mellitus and interacts with adiposity to alter insulin secretion in Mexican Americans. *Diabetes* 2007; **56**:1481–1485.
- Yu W, Gwinn M, Clyne M, Yesupriya A, Khoury MJ. A navigator for human genome epidemiology. *Nat Genet* 2008; **40**:124–125.
- Zaidi FK, Wareham NJ, McCarthy MI, Holdstock J, Kalloo-Hosein H, Krook A, Swinn RA, O'Rahilly S. Homozygosity for a common polymorphism in the islet-specific promoter of the glucokinase gene is associated with a reduced early insulin response to oral glucose in pregnant women. *Diabet Med* 1997; **14**:228–234.
- Zhang C, Ning Y. Effect of dietary and lifestyle factors on the risk of gestational diabetes: review of epidemiologic evidence. *Am J Clin Nutr* 2011; **94**:1975S–1979S.
